# Supplementary material for: Siderophore cheating and cheating resistance shape competition for iron in soil and freshwater Pseudomonas communities
Source: PubMed Central journal article supplement (PMC5583256; doi:10.1038/s41467-017-00509-4), 2017-09-04
Supplement: 41467_2017_509_MOESM1_ESM.pdf [file 41467_2017_509_MOESM1_ESM.pdf]

# SI GUIDE

File Name: Supplementary Information

Description: Supplementary Figures, Supplementary Tables, Supplementary Methods and Supplementary References.

File Name: Peer Review File

Description:

13 **Supplementary Figures**

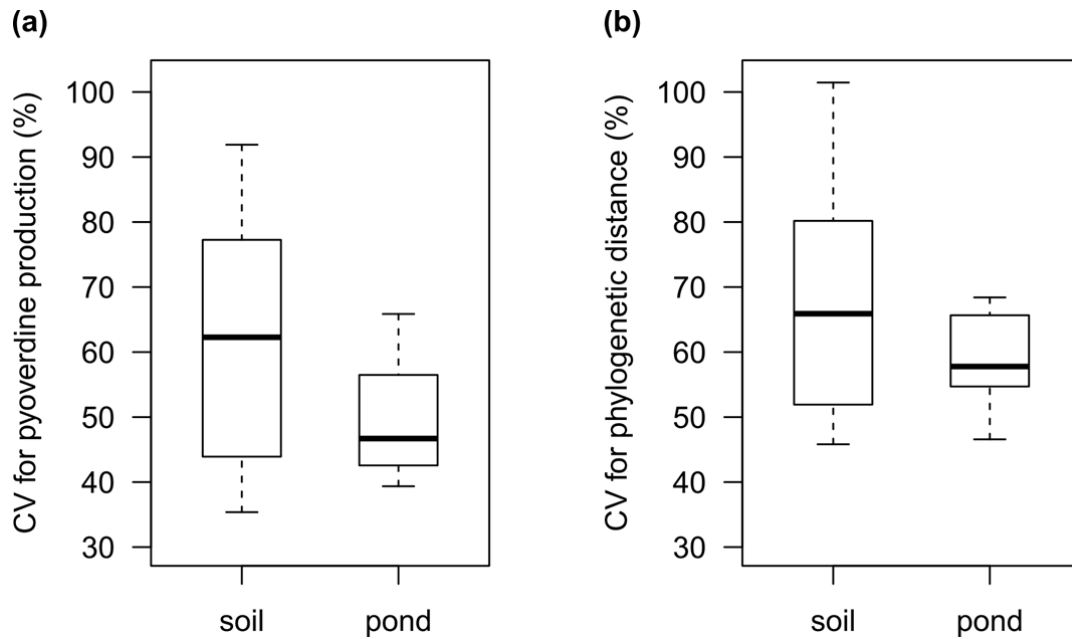

14

15 **Supplementary Figure 1 | Pyoverdine production and phylogenetic diversity was highly**  
16 **variable in both soil and pond communities.** (a) The coefficients of variation (CV =  
17 standard deviation / mean) for relative pyoverdine production was high in all communities.  
18 (b) The CV for phylogenetic distance was also high in both soil and pond communities. For  
19 both analyses, the CVs were calculated separately for each of the 16 communities, and based  
20 on a total of 158 soil and 157 pond isolates for (a), and 148 soil and 149 pond isolates for (b).  
21 Box plots show the median, the 1<sup>st</sup> and the 3<sup>rd</sup> quartile, and the 95% confidence interval.

22

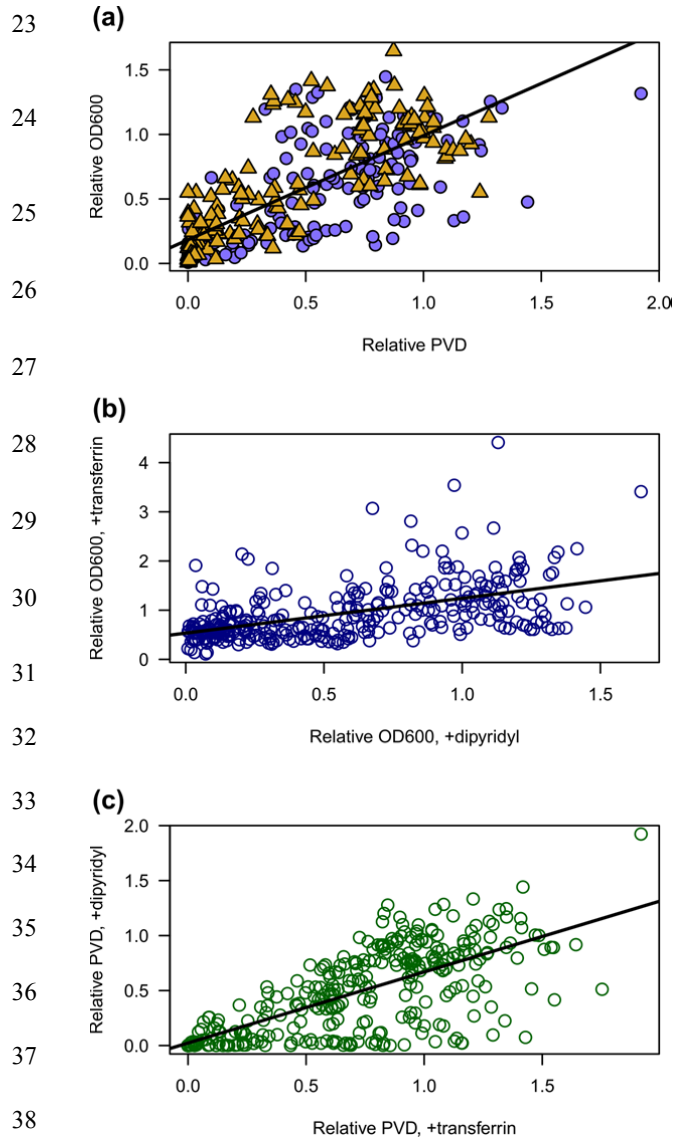

39 **Supplementary Figure 2 | Growth and pyoverdine production of natural isolates**  
 40 **significantly correlate between different iron-limited environments.** (a) Significant  
 41 positive correlation between the relative growth (OD<sub>600</sub>) and the relative pyoverdine  
 42 production (PVD) of natural soil (yellow triangles, n = 158) and pond (purple circles, n = 157)  
 43 isolates grown in CAA medium supplemented with the iron chelator 2,2'-dipyridyl (400 μM)  
 44 (linear mixed model:  $t_{298} = 19.67$ ,  $p < 0.001$ , solid line). (b) Relative growth (OD<sub>600</sub>) and (c)  
 45 relative pyoverdine production levels for isolates positively correlated between two different  
 46 iron-limited media (indicated by solid lines): CAA medium with the natural iron chelator apo-  
 47 transferrin versus CAA medium with the synthetic chelator, 2,2'-dipyridyl (linear models for  
 48 relative OD<sub>600</sub>:  $t_{313} = 10.6$ ,  $p < 0.001$ ,  $R^2 = 0.262$ ; relative pyoverdine production:  $t_{313} = 16.9$ ,  $p$   
 49  $< 0.001$ ,  $R^2 = 0.475$ ). Values represent means across three replicates.

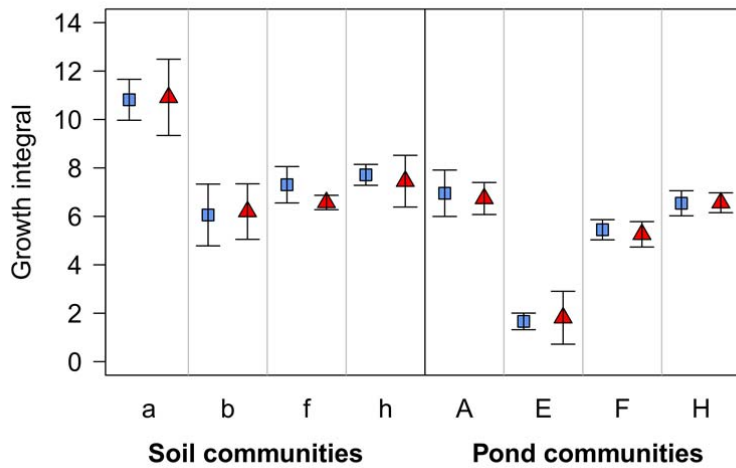

50

51 **Supplementary Figure 3 | The introduction of a constitutive mCherry marker did not**  
 52 **affect strain growth.** We fluorescently tagged eight non-producers to be used in direct  
 53 competition assays against producers. To test whether the fluorescent marker itself has a  
 54 fitness effect, we grew tagged (red triangles) and untagged (blue squares) non-producers in  
 55 iron-limited CAA medium as monocultures. There was no significant growth difference  
 56 between tagged and untagged strains (paired  $t$ -test:  $t_7 = -1.17$ ,  $p = 0.279$ ). Strains were grown  
 57 for 48 h as static cultures. Values are given as means  $\pm$  95% confidence intervals across three  
 58 replicates.

59

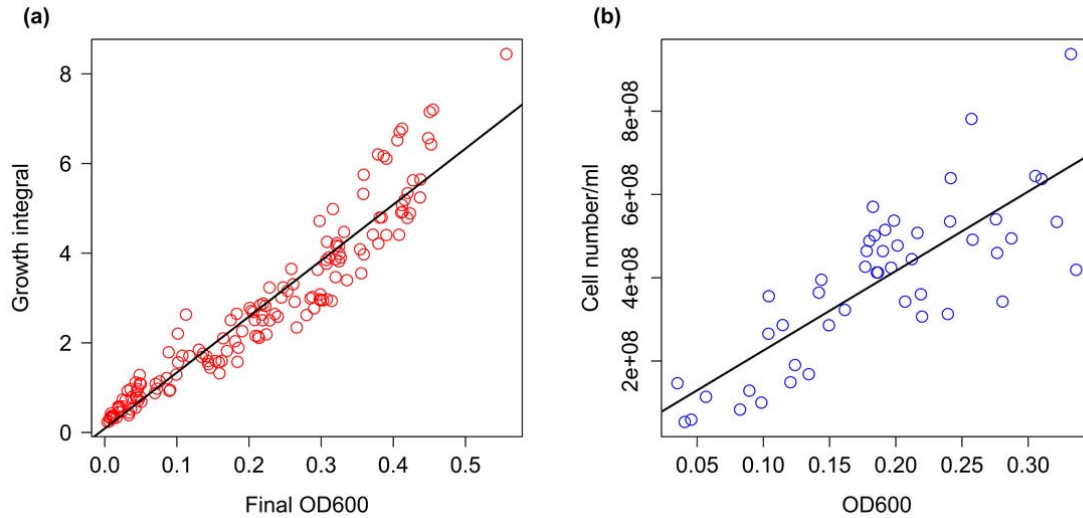

60

61 **Supplementary Figure 4 | Final OD<sub>600</sub> is an accurate measure of bacterial growth and**  
 62 **cell density.** In our high-throughput assays, we used final OD<sub>600</sub> as a proxy for culture  
 63 growth. Because we worked with environmental isolates that differ in many aspects, we  
 64 carried out two control experiments to confirm that final OD<sub>600</sub> is a reliable measure of  
 65 growth. **(a)** For a subset of isolates ( $n = 78$  for soil,  $n = 77$  for pond), we compared final  
 66 OD<sub>600</sub> to growth integrals obtained from 24-h kinetic growth measurements in iron-limited  
 67 medium (CAA with 400  $\mu\text{M}$  2,2'-dipyridyl). We found a strong significant positive  
 68 correlation between the two growth measurements (linear model:  $t_{153} = 45.89$ ,  $p < 0.001$ ,  $R^2 =$   
 69  $0.932$ , solid line). Values represent means across three replicates. **(b)** For another subset of  
 70 isolates (each  $n = 24$  for soil and pond), we compared final OD<sub>600</sub> to cell count measures  
 71 (cells/ml) obtained from flow cytometry. We also found a strong positive correlation between  
 72 the two measurements of growth (linear model:  $t_{46} = 9.06$ ,  $p < 0.001$ ,  $R^2 = 0.633$ , solid line).

73

74 **Supplementary Tables**75 **Supplementary Table 1** | Reference strains used in growth and fluorescence measurement  
76 assays.

| <b>Strain</b>                            | <b>Description</b>                                       | <b>Source or reference</b>                          |
|------------------------------------------|----------------------------------------------------------|-----------------------------------------------------|
| <i>P. aureofaciens</i><br>ATCC13985      | wildtype                                                 | L. Eberl strain collection,<br>University of Zurich |
| <i>P. entomophila</i>                    | wildtype                                                 | L. Eberl strain collection,<br>University of Zurich |
| <i>P. protegens</i> CHA0                 | wildtype                                                 | 1                                                   |
| <i>P. putida</i> IsoF                    | wildtype, isolated from tomato<br>rhizosphere            | 2                                                   |
| <i>P. syringae</i> B728a                 | wildtype                                                 | L. Eberl strain collection,<br>University of Zurich |
| <i>P. aeruginosa</i> PAO1<br>(ATCC15692) | wildtype; pyoverdine type I                              | 3,4                                                 |
| <i>P. aeruginosa</i> 2-164               | CF isolate United States;<br>pyoverdine type II          | 5,6                                                 |
| <i>P. aeruginosa</i> ATCC 013            | Laboratory isolate United<br>States; pyoverdine type III | 5,6                                                 |

77

78 **Supplementary Table 2** | GenBank accession or locus tag numbers of partial or complete  
 79 *rpoD* sequences used as an outgroup or references for phylogenetic trees.

| Strain                                                  | <i>rpoD</i> accession or locus tag | Group                 | Subgroup               |
|---------------------------------------------------------|------------------------------------|-----------------------|------------------------|
| <i>P. aeruginosa</i> PAO1                               | NP_249267                          | <i>P. aeruginosa</i>  |                        |
| <i>P. chlororaphis</i> subsp. <i>aureofaciens</i> 30-84 | PCHL3084_RS27440                   | <i>P. fluorescens</i> | <i>P. chlororaphis</i> |
| <i>P. kilonensis</i> 520-20T (DSM 13647T)               | AM084336                           | <i>P. fluorescens</i> | <i>P. corrugata</i>    |
| <i>P. fluorescens</i> A506                              | CP003041                           | <i>P. fluorescens</i> | <i>P. fluorescens</i>  |
| <i>P. marginalis</i> NCPPB 667                          | AB039575                           | <i>P. fluorescens</i> | <i>P. fluorescens</i>  |
| <i>P. meridiana</i> CIP 108465T                         | FN554485                           | <i>P. fluorescens</i> | <i>P. gessardi</i>     |
| <i>P. jessenii</i> CIP 105274T                          | FN554473                           | <i>P. fluorescens</i> | <i>P. jessenii</i>     |
| <i>P. umsongensis</i> LMG 21317T                        | FN554516                           | <i>P. fluorescens</i> | <i>P. jessenii</i>     |
| <i>P. koreensis</i> LMG 21318T                          | FN554476                           | <i>P. fluorescens</i> | <i>P. koreensis</i>    |
| <i>P. fluorescens</i> R124                              | I1A_004757                         | <i>P. fluorescens</i> | <i>P. koreensis</i>    |
| <i>P. moraviensis</i> DSM 16007T                        | FN554490                           | <i>P. fluorescens</i> | <i>P. koreensis</i>    |
| <i>P. helmanticensis</i> OHA11                          | HG940517                           | <i>P. fluorescens</i> | <i>P. koreensis</i>    |
| <i>P. lini</i> CIP 107460T                              | FN554478                           | <i>P. fluorescens</i> | <i>P. mandelii</i>     |
| <i>P. frederiksbergensis</i> DSM 13022T                 | AM084335                           | <i>P. fluorescens</i> | <i>P. mandelii</i>     |
| <i>P. fluorescens</i> ATCC 17467                        | AB039530                           | <i>P. fluorescens</i> |                        |
| <i>P. graminis</i> LMG 21661T                           | FN554469                           | <i>P. lutea</i>       |                        |
| <i>P. putida</i> KT2440                                 | NC_002947                          | <i>P. putida</i>      |                        |
| <i>P. alkylphenolica</i> JCM 16553T                     | HE577794                           | <i>P. putida</i>      |                        |
| <i>P. japonica</i> JCM 21532T                           | HE577795                           | <i>P. putida</i>      |                        |
| <i>P. cichorii</i> NCPPB 943                            | AB039526                           | <i>P. syringae</i>    |                        |
| <i>P. syringae</i> pv. <i>tomato</i> DC3000             | PSPTO_0537                         | <i>P. syringae</i>    |                        |

80 **Supplementary Table 3** | Software packages used for data analysis.

---

| <b>Package</b>                     | <b>Application</b>                                                  | <b>Reference</b>                                                                                      |
|------------------------------------|---------------------------------------------------------------------|-------------------------------------------------------------------------------------------------------|
| MEGA 7 software                    | Phylogenetic analysis                                               | 7                                                                                                     |
| iTOL web tool                      | Plotting of phylogenetic trees                                      | 8                                                                                                     |
| EMBOSS water                       | Relatedness analysis between pairs of sequences                     | <a href="http://www.ebi.ac.uk/tools/psa/emboss_water/">www.ebi.ac.uk/<br/>tools/psa/emboss_water/</a> |
| grofit                             | Growth curve analysis in R                                          | 9                                                                                                     |
| Image J                            | Image analysis                                                      | 10                                                                                                    |
| Trimmomatic                        | Filtering of sequence reads                                         | 11                                                                                                    |
| SPAdes 3.10.1                      | Assembling sequence reads                                           | 12                                                                                                    |
| RAST automated annotation pipeline | Identification and annotation of putative coding sequences          | 13,14                                                                                                 |
| OrthoFinder                        | Identification of gene family profiles                              | 15                                                                                                    |
| PKS/NRPS analysis website          | Predicting amino acid sequence of non-ribosomal peptide synthetases | 16                                                                                                    |
| APE v3.2                           | Phylogenetic analysis in R                                          | 17                                                                                                    |
| picante v1.6-2                     | Calculating Blomberg's K-values                                     | 18                                                                                                    |

---

81

82



83 **Supplementary Table 4** | Strains used for fluorescent tagging.

| <b>Strain</b>                                           | <b>Relevant properties</b>                                                                  | <b>Source</b>                                    |
|---------------------------------------------------------|---------------------------------------------------------------------------------------------|--------------------------------------------------|
| <i>E. coli</i> S17-1 $\lambda$ pir pUX-BF13             | with conjugation elements and helper plasmid                                                | L. Eberl strain collection, University of Zurich |
| <i>E. coli</i> S17 $\lambda$ pir miniTn7-Ptac-mCherry   | with mini-Tn7 plasmid carrying mCherry under constitutive promoter                          | J. van der Meer, University of Lausanne          |
| <i>E. coli</i> S17-1 $\lambda$ pir miniTn7-Ptac-mCherry | with conjugation elements and mini-Tn7 plasmid carrying mCherry under constitutive promoter | L. Eberl strain collection, University of Zurich |

84 **Supplementary Methods**

85 **Pyoverdine purification assay.** We adapted the method of Meyer et al. <sup>19</sup> to crudely purify  
86 pyoverdine from the 16 producer strains. Briefly, we added 2 ml of producer overnight LB  
87 culture to 500 ml CAA with 200  $\mu$ M 2,2'-dipyridyl in a 1 L glass flask, and let cultures grow  
88 for 24 h at 25°C shaken (100 rpm). Afterwards, we centrifuged cultures at 7,500 rcf for 15  
89 min (in 50 ml aliquots). We acidified supernatants with HCl 1 M till pH = 6 and centrifuged  
90 again at 5,000 rcf for 10 min. The supernatant was then added on a XAD-4 (Amberlite)  
91 column with a flux of two drops per second. The column was washed with 300 ml of Milli-Q  
92 water. 50% methanol (in Milli-Q water) was subsequently used as an eluent. We collected  
93 fractions of the eluate that showed peak pyoverdine fluorescence (150 – 250 ml). The  
94 fractions were distributed in Petri dishes and left for 24 h under a hood to let methanol  
95 evaporate. The residues were first dissolved in Milli-Q water, then combined and lyophilised  
96 for 48 h (Lyovac). Columns were regenerated by washing with 1 L of methanol containing  
97 1% of concentrated HCl (32%) and then washed with 1 L of Milli-Q water.

98

99 **Fluorescent tagging.** We tagged the eight non-producers with a red fluorescent mCherry  
100 protein gene via electroporation or conjugation using a mini-Tn7 system for chromosomal  
101 integration <sup>20</sup>. Electroporation protocol was adapted from Choi & Schweizer <sup>21</sup>. We used  
102 donor strains *Escherichia coli* S17  $\lambda$ pir and S17-1  $\lambda$ pir carrying a plasmid with the mini Tn7-  
103 mCherry construct under constitutive promoter <sup>22</sup>, and a helper strain *E.coli* S17-1  $\lambda$ pir  
104 carrying a helper plasmid (pUX-BF13) <sup>23</sup>. S17-1 strains additionally contain a chromosomal  
105 insertion with the conjugation elements and they were used for conjugation.

106

107 **Electroporation.** *E. coli* donor and helper strains were grown in 4 ml of LB supplemented  
108 with an appropriate antibiotic in 14 ml polypropylene round-bottom tubes shaken (200 rpm)

109 at 37 °C for 24 h. Plasmids were purified using a ZR Plasmid Miniprep-Classic kit (Zymo  
110 Research) following manufacturer's instructions. Main modifications to the protocol of Choi  
111 & Schweizer <sup>21</sup>: (a) we harvested isolates grown in LB at OD<sub>600</sub> = 0.3 - 0.7; (b) 500 ng - 1.8  
112 µg of each plasmid were used; (c) after electroporation we recovered bacteria for 3 - 4.5 h at  
113 28 °C shanking (160 rpm), and then (d) plated them on LB-agar (12%) with different  
114 gentamycin concentration (8, 30, 35 or 45 µg/ml), and incubated the plates at room  
115 temperature for 2 - 3 days.

116

117 **Conjugation.** We pelleted overnight cultures (grown as described above or in 5 ml of LB in  
118 50 ml falcon tubes) of donor, helper, and recipient (soil or pond non-producer) at 7,500 rcf for  
119 5 min. Then we washed the pellets with 2 ml of a 0.85% NaCl solution, pelleted at the same  
120 speed and suspended the pellets in LB broth, so that the donor and helper were 2 - 4 times  
121 more concentrated than the recipient. A mixture of the three bacteria was incubated at 28 °C  
122 overnight as two 50 µl drops on an LB-agar (12%) plate. Afterwards, we suspended the drops  
123 in 800 µl of 0.85% NaCl solution, and spread 10 µl, 100 µl and the remaining concentrated  
124 culture on *Pseudomonas* selective plates (PIA, *Pseudomonas* isolation agar) with a proper  
125 gentamycin concentration (8, 30 or 45 µg/ml). Plates were incubated at room temperature for  
126 2 - 4 days.

127

128 Three single colonies per isolate that were fluorescing when checked with Infinity3 camera  
129 system (Lumenera corporation), were streaked out for single colonies on LB-agar plates. We  
130 wanted to choose those transformants that grew most similar to their untagged version. For  
131 this, we first pre-grew the untagged and tagged strains in LB and then in CAA with 200 µM  
132 2,2'-dipyridyl and compared their growth (OD<sub>600</sub> after 24 h of incubation at room

133 temperature; measured with Tecan microplate reader). The tagged strains that grew most  
134 similar to their wildtype were chosen for the next experiments.

135

136 We further wanted to check whether mCherry marker has fitness consequences for the chosen  
137 transformants (Supplementary Fig. 3). For this, we first grew untagged and tagged versions of  
138 the non-producers in LB overnight. Then we adjusted cultures to  $OD_{600} = 1$  with LB and  
139 added 2  $\mu$ l of the adjusted cultures to 200  $\mu$ l of CAA with 200  $\mu$ M 2,2'-dipyridyl in 96-well  
140 plates, in triplicates.  $OD_{600}$  was measured every 30 min at room temperature (25 - 28 °C) for  
141 48 h in a Tecan microplate reader. Growth curves were analysed as described in the section  
142 'Measurement of growth and pyoverdine production levels'. Statistical analysis revealed that,  
143 overall, mCherry marker did not impair growth of the isolates (Supplementary Fig. 3).

144

## 145 **Supplementary References**

- 146 1. Laville, J. *et al.* Characterization of the *hcnABC* gene cluster encoding hydrogen  
147 cyanide synthase and anaerobic regulation by ANR in the strictly aerobic biocontrol  
148 agent *Pseudomonas fluorescens* CHA0. *J. Bacteriol.* **180**, 3187-3196 (1998).
- 149 2. Steidle, A. *et al.* Identification and characterization of an N-acylhomoserine lactone-  
150 dependent quorum-sensing system in *Pseudomonas putida* strain IsoF. *Appl. Environ.*  
151 *Microbiol.* **68**, 6371-6382 (2002).
- 152 3. Stover, C. K. *et al.* Complete genome sequence of *Pseudomonas aeruginosa* PAO1,  
153 an opportunistic pathogen. *Nature* **406**, 959-964 (2000).
- 154 4. Ghysels, B. *et al.* FpvB, an alternative type I ferripyoverdine receptor of *Pseudomonas*  
155 *aeruginosa*. *Microbiology* **150**, 1671-1680 (2004).
- 156 5. Smith, E. E., Sims, E. H., Spencer, D. H., Kaul, R. & Olson, M. V. Evidence for  
157 diversifying selection at the pyoverdine locus of *Pseudomonas aeruginosa*. *J.*  
158 *Bacteriol.* **187**, 2138-2147 (2005).
- 159 6. Jiricny, N. *et al.* Fitness correlates with the extent of cheating in a bacterium *J. Evol.*  
160 *Biol.* **23**, 738-747 (2010).
- 161 7. Kumar, S., Stecher, G. & Tamura, K. MEGA7: molecular evolutionary genetics  
162 analysis version 7.0 for bigger datasets. *Mol. Biol. Evol.* **33**, 1870-1874 (2016).
- 163 8. Letunic, I. & Bork, P. Interactive Tree Of Life v2: online annotation and display of  
164 phylogenetic trees made easy. *Nucleic Acids Res.* **39**, W475-478 (2011).
- 165 9. Kahm, M., Hasenbrink, G., Lichtenberg-Fraté, H., Ludwig, J. & Kschischo, M. grofit:  
166 fitting biological growth curves with R. *J. Stat. Softw.* **33** (2010).
- 167 10. Schneider, C. A., Rasband, W. S. & Eliceiri, K. W. NIH Image to ImageJ: 25 years of  
168 image analysis. *Nat. Methods* **9**, 671-675 (2012).
- 169 11. Bolger, A. M., Lohse, M. & Usadel, B. Trimmomatic: a flexible trimmer for Illumina  
170 sequence data. *Bioinformatics* **30**, 2114-2120 (2014).
- 171 12. Bankevich, A. *et al.* SPAdes: a new genome assembly algorithm and its applications  
172 to single-cell sequencing. *J. Comput. Biol.* **19**, 455-477 (2012).
- 173 13. Aziz, R. K. *et al.* The RAST Server: rapid annotations using subsystems technology.  
174 *BMC Genomics* **9**, 75 (2008).
- 175 14. Overbeek, R. *et al.* The SEED and the Rapid Annotation of microbial genomes using  
176 Subsystems Technology (RAST). *Nucleic Acids Res.* **42**, D206-214 (2014).

- 177 15. Emms, D. M. & Kelly, S. OrthoFinder: solving fundamental biases in whole genome  
178 comparisons dramatically improves orthogroup inference accuracy. *Genome Biology*  
179 **16**, 157 (2015).
- 180 16. Bachmann, B. O. & Ravel, J. Methods for *in silico* prediction of microbial polyketide  
181 and nonribosomal peptide biosynthetic pathways from DNA sequence data. *Methods*  
182 *Enzymol.* **458**, 181-217 (2009).
- 183 17. Paradis, E., Claude, J. & Strimmer, K. APE: analyses of phylogenetics and evolution  
184 in R language. *Bioinformatics* **20**, 289-290 (2004).
- 185 18. Kembel, S. W. *et al.* Picante: R tools for integrating phylogenies and ecology.  
186 *Bioinformatics* **26**, 1463-1464 (2010).
- 187 19. Meyer, J. M. *et al.* Use of siderophores to type pseudomonads: the three *Pseudomonas*  
188 *aeruginosa* pyoverdine systems. *Microbiology* **143**, 35-43 (1997).
- 189 20. Lambertsen, L., Sternberg, C. & Molin, S. Mini-Tn7 transposons for site-specific  
190 tagging of bacteria with fluorescent proteins. *Environ. Microbiol.* **6**, 726-732 (2004).
- 191 21. Choi, K.-H. & Schweizer, H. P. mini-Tn7 insertion in bacteria with single attTn7 sites:  
192 example *Pseudomonas aeruginosa*. *Nat. Protoc.* **1**, 153-161 (2006).
- 193 22. Rochat, L., Péchy-Tarr, M., Baehler, E., Maurhofer, M. & Keel, C. Combination of  
194 fluorescent reporters for simultaneous monitoring of root colonization and antifungal  
195 gene expression by a biocontrol pseudomonad on cereals with flow cytometry. *Mol.*  
196 *Plant Microbe Interact.* **23**, 949-961 (2010).
- 197 23. Bao, Y., Lies, D. P., Fu, H. & Roberts, G. P. An improved Tn7-based system for the  
198 single-copy insertion of cloned genes into chromosomes of Gram-negative bacteria.  
199 *Gene* **109**, 167-168 (1991).

200
